# Supplementary material
Source: publisher figshare collection journal article supplement (https://frontiersin.figshare.com/ndownloader/files/12359183)

Majumder S, Datta K, Sarkar C, Saha SC and Datta SK (2018) The Development of *Macrophomina phaseolina* (Fungus) Resistant and Glufosinate (Herbicide) Tolerant Transgenic Jute. *Front. Plant Sci.* 9:920. doi: 10.3389/fpls.2018.00920

## Supplementary Figure 1

### Effects of residual Basta® on growth (height) of indicator plants cucumber and corn

Indicator plants (cucumber and corn) after two weeks of seed germination in 0.25 %, 0.50 % and 1.0 % Basta sprayed pots with untreated pots as control. Plants were maintained in greenhouse condition and watered regularly.

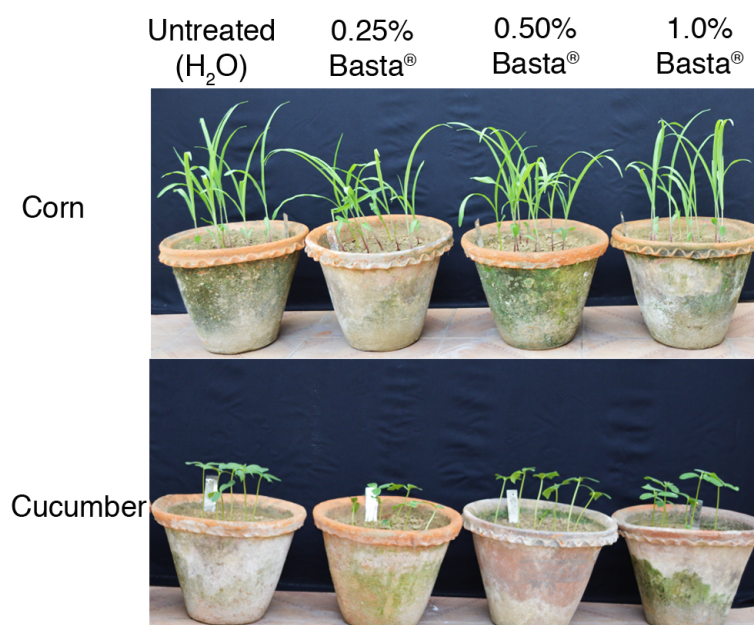

Supplement: Supplementary file [file 12359183]
